# Supplementary material for: Comparative profiling of canonical and non-canonical small RNAs in the rice blast fungus, Magnaporthe oryzae
Source: Front Microbiol. 2022 Sep 26;13:995334. doi: 10.3389/fmicb.2022.995334 (PMC9549407; doi:10.3389/fmicb.2022.995334)
Supplement: Supplementary Data Sheet 2 — DEGs in conidiation stage. [file Data_Sheet_2.XLSX]

## Sheet: UP_DEG
Chromosome	Strand	Start	End	Transcript_id	length	Locus_id	FPKM_KJ201	FPKM_Moeri-1	Log2 foldchange
3	-	1371393	1372956	MGG_07653T0	1564	MGG_07653	0.001865	2.14883	1.65213
3	-	5086718	5088291	MGG_05234T0	1574	MGG_05234	0.008669	2.29616	1.70834
2	+	5883991	5885282	MGG_08155T1	1029	MGG_08155	0.060479	2.31213	1.64304
2	-	3093129	3096059	MGG_15672T0	2931	MGG_15672	0.091277	2.42979	1.6521
2	-	2848311	2850166	MGG_15654T0	1451	MGG_15654	0.127704	2.60081	1.67493
3	-	4609060	4610465	MGG_05101T0	1167	MGG_05101	0.10941	2.61068	1.70248
5	+	3513537	3514492	MGG_17490T0	956	MGG_17490	0.00169	2.62672	1.85623
1	+	3821678	3823690	MGG_09224T0	2013	MGG_09224	0.057851	2.70311	1.8076
1	-	7291654	7294308	MGG_04501T0	2464	MGG_04501	0.126458	2.79535	1.75244
1	+	7012394	7016646	MGG_04640T0	4054	MGG_04640	0.242257	2.86104	1.63603
7	+	1061157	1062586	MGG_17928T0	1263	MGG_17928	0.168301	2.92113	1.74686
8	+	286796	288425	MGG_10257T0	1332	MGG_10257	0.328106	3.05046	1.60872
7	+	848423	848812	MGG_12552T0	276	MGG_12552	0.260056	3.07882	1.69466
1	+	5458880	5460496	MGG_05506T0	1453	MGG_05506	0.058452	3.10479	1.95535
3	+	2175755	2177966	MGG_05979T0	1647	MGG_05979	0.038139	3.10618	1.9838
3	+	2485041	2487154	MGG_13220T1	2002	MGG_13220	0.079449	3.15496	1.94454
2	-	3755914	3756861	MGG_01488T0	786	MGG_01488	0	3.23999	2.08406
3	+	2418169	2421513	MGG_06058T0	3153	MGG_06058	0.139205	3.28374	1.91084
6	+	1740238	1740977	MGG_04167T0	687	MGG_04167	0.269197	3.4732	1.81739
1	+	675636	678506	MGG_16038T0	2396	MGG_16038	0	3.51763	2.17557
4	-	4252336	4254087	MGG_06298T0	1645	MGG_06298	0.295825	3.55582	1.81384
5	-	3386709	3387958	MGG_00292T0	1250	MGG_00292	0.389886	3.66417	1.74665
4	-	71134	74471	MGG_10681T0	3125	MGG_10681	0	3.66433	2.22167
7	-	1613583	1614205	MGG_17972T0	553	MGG_17972	0.346818	3.73135	1.8127
7	-	1376309	1378091	MGG_02827T0	1683	MGG_02827	0.206906	3.76982	1.98262
1	+	3665155	3670127	MGG_09186T1	4746	MGG_09186	0.038627	3.87057	2.22941
4	-	3183160	3185686	MGG_06588T0	2330	MGG_06588	0.39952	3.92411	1.81493
2	+	2419021	2419468	MGG_09001T0	360	MGG_09001	0.10993	3.97768	2.165
7	-	1982609	1989019	MGG_02665T0	6411	MGG_02665	0.007973	3.98095	2.30496
2	-	5511059	5512184	MGG_15809T0	1126	MGG_15809	0.030122	4.0318	2.28826
7	-	1073978	1079580	MGG_15000T0	5603	MGG_15000	0.333989	4.08683	1.93102
4	+	5486249	5486633	MGG_09693T0	309	MGG_09693	0.169334	4.09054	2.12213
1	-	5514810	5516883	MGG_16393T0	2074	MGG_16393	0.021762	4.13325	2.32881
6	-	2959226	2960726	MGG_03813T0	1203	MGG_03813	0	4.1351	2.36039
6	+	3728561	3733407	MGG_17821T0	4531	MGG_17821	0.669039	4.17208	1.63173
1	-	6171135	6172650	MGG_05702T0	1375	MGG_05702	0.257748	4.20748	2.04974
5	-	4429065	4430803	MGG_00016T0	1461	MGG_00016	0.458542	4.27835	1.85556
1	+	645380	646693	MGG_14601T0	1314	MGG_14601	0.044737	4.35758	2.35844
5	+	1303074	1303378	MGG_17353T0	231	MGG_17353	0.049512	4.40348	2.36417
2	+	7775321	7778321	MGG_08340T0	3001	MGG_08340	0.198798	4.49112	2.19551
2	-	7794771	7795933	MGG_08333T0	1163	MGG_08333	0.59901	4.56612	1.79949
4	-	1769642	1774269	MGG_15277T0	4505	MGG_15277	0.057976	4.56933	2.3962
2	+	6130811	6131545	MGG_07024T0	735	MGG_07024	0.129366	4.69252	2.33355
3	-	3973725	3974321	MGG_04925T0	597	MGG_04925	0.352032	4.7225	2.08152
6	+	2873233	2874738	MGG_17743T0	1394	MGG_17743	0.402795	4.7285	2.02985
2	+	4719601	4720899	MGG_01756T0	1121	MGG_01756	0.549948	4.81404	1.90732
4	-	5371250	5371465	MGG_17276T0	216	MGG_17276	0.04819	4.84734	2.47988
6	-	1499614	1502852	MGG_17668T0	3161	MGG_17668	0.21346	4.89677	2.2808
3	+	2147861	2149656	MGG_05968T0	1710	MGG_05968	0.789675	4.91259	1.72409
2	+	3346506	3350504	MGG_15688T0	3367	MGG_15688	0.584952	4.93737	1.90539
1	+	3805779	3807862	MGG_09217T0	1987	MGG_09217	0.245256	5.0203	2.27339
7	-	506976	512310	MGG_17877T0	5118	MGG_17877	0.237395	5.03709	2.28655
3	+	4320117	4320701	MGG_15120T0	506	MGG_15120	0.046429	5.05432	2.53249
1	+	6878564	6878950	MGG_04715T0	267	MGG_04715	0.864795	5.05933	1.70014
2	-	2754841	2761069	MGG_01227T0	5942	MGG_01227	0.480247	5.11322	2.0461
3	+	5247071	5249426	MGG_05277T0	2356	MGG_05277	0.632202	5.16155	1.91647
2	-	2015948	2018157	MGG_08891T0	2037	MGG_08891	0.058169	5.17718	2.54538
3	-	4974243	4978802	MGG_05211T0	4310	MGG_05211	0	5.18065	2.62776
5	-	3604659	3605153	MGG_11627T0	495	MGG_11627	0.552413	5.21361	2.00092
7	+	1117669	1118133	MGG_02893T0	465	MGG_02893	0.155604	5.36775	2.46214
5	+	516239	517284	MGG_01098T0	774	MGG_01098	0.072181	5.44431	2.58748
1	+	760030	761510	MGG_02159T0	1377	MGG_02159	0.094962	5.44531	2.55737
1	-	3377223	3378692	MGG_06959T0	1470	MGG_06959	0.081464	5.55682	2.60001
1	-	2949816	2950746	MGG_16187T0	827	MGG_16187	0.274942	5.76529	2.40772
3	-	2041548	2043003	MGG_05938T0	1456	MGG_05938	0.073328	5.78478	2.66021
6	+	1431968	1432734	MGG_04245T0	651	MGG_04245	0.05308	5.88233	2.70828
7	+	1505722	1508336	MGG_17962T0	2256	MGG_17962	0.869717	5.89839	1.88344
4	+	2330583	2331055	MGG_17118T0	375	MGG_17118	0.078686	5.9708	2.69205
1	+	4474515	4476197	MGG_09951T0	1551	MGG_09951	1.34598	6.07913	1.59338
3	-	559617	562375	MGG_07419T0	2473	MGG_07419	0.703552	6.08272	2.05576
5	+	4193964	4195902	MGG_00079T0	1866	MGG_00079	0.025741	6.0859	2.78828
2	-	5557167	5558180	MGG_08058T0	1014	MGG_08058	0.407787	6.10269	2.33494
4	-	4848311	4850176	MGG_10038T0	1866	MGG_10038	0.129214	6.12611	2.6578
5	-	4464494	4465195	MGG_17554T0	576	MGG_17554	0	6.20306	2.84861
1	-	4150396	4154256	MGG_09303T0	3690	MGG_09303	0.455931	6.2565	2.31733
4	-	1126572	1129041	MGG_03651T0	2240	MGG_03651	0.687423	6.26534	2.10621
6	+	2962768	2964666	MGG_03811T0	1701	MGG_03811	0.544277	6.26613	2.23426
5	+	646613	647952	MGG_01060T0	1340	MGG_01060	0.563163	6.66422	2.29367
7	-	2708855	2710765	MGG_09012T0	1521	MGG_09012	1.35823	6.78444	1.72289
3	+	937994	941849	MGG_07532T0	3856	MGG_07532	0.078021	6.85004	2.86431
1	-	3863323	3864808	MGG_09234T0	1218	MGG_09234	0	6.96603	2.99386
1	+	4631066	4632969	MGG_10503T0	1904	MGG_10503	0.201985	7.03287	2.7405
5	-	2111770	2113163	MGG_17398T0	1394	MGG_17398	1.68286	7.05802	1.58665
2	-	1928025	1929974	MGG_08869T0	1950	MGG_08869	0.938542	7.14857	2.07157
1	-	4125455	4129473	MGG_09293T0	3847	MGG_09293	0.762398	7.2398	2.22507
1	-	5910725	5913371	MGG_05631T0	2550	MGG_05631	0.805152	7.30846	2.20246
3	+	4218294	4221060	MGG_04996T0	2767	MGG_04996	1.66845	7.36942	1.64912
4	+	603516	605279	MGG_08548T0	1764	MGG_08548	0.055121	7.37866	2.98931
3	+	5304495	5306879	MGG_05291T0	2327	MGG_05291	0.090625	7.3964	2.94462
4	-	1765767	1766469	MGG_03466T0	618	MGG_03466	0	7.44758	3.07854
2	+	2224459	2224946	MGG_08944T0	488	MGG_08944	0.875976	7.47252	2.17515
5	+	355380	356890	MGG_14635T0	1511	MGG_14635	0.496096	7.49593	2.50557
7	+	1118395	1118574	MGG_17939T0	180	MGG_17939	0.053745	7.54433	3.01944
3	+	4603062	4607195	MGG_05099T0	3847	MGG_05099	0	7.71031	3.12272
1	+	1532319	1533407	MGG_02355T0	1089	MGG_02355	1.87416	7.74337	1.60505
6	+	3140128	3143024	MGG_03763T0	2477	MGG_03763	0.314596	8.2256	2.81102
4	-	5373509	5375786	MGG_09728T0	1871	MGG_09728	1.39465	8.23982	1.94805
2	+	7179115	7180110	MGG_15900T0	996	MGG_15900	0.030602	8.25085	3.1661
7	-	2705682	2708333	MGG_18046T0	2451	MGG_18046	2.05728	8.39877	1.62023
2	+	3337193	3342341	MGG_14778T0	4740	MGG_14778	0.786595	8.56409	2.42041
3	+	2939307	2943261	MGG_06205T0	3879	MGG_06205	0.482658	8.6098	2.69632
2	+	3392199	3393851	MGG_01397T0	1563	MGG_01397	0.085575	8.67908	3.15641
5	+	401607	407692	MGG_01128T0	6009	MGG_01128	1.24366	8.7067	2.11313
3	-	3714633	3719328	MGG_04852T0	4577	MGG_04852	1.98803	8.71452	1.70095
2	+	5474364	5476054	MGG_15807T0	1568	MGG_15807	0.255383	8.74204	2.9561
1	+	1140761	1141469	MGG_16076T0	600	MGG_16076	0.469674	8.91546	2.75418
7	-	1113717	1114611	MGG_17937T0	744	MGG_17937	2.21152	8.94343	1.63049
3	+	4056387	4056855	MGG_04953T0	294	MGG_04953	1.23936	8.99644	2.15833
1	-	5763555	5764268	MGG_13126T0	714	MGG_13126	2.16932	9.0239	1.6612
2	-	180926	183037	MGG_10865T0	2112	MGG_10865	2.05677	9.05285	1.71753
5	-	4057888	4062504	MGG_00123T0	4347	MGG_00123	0.083231	9.11903	3.22366
2	+	4817425	4818977	MGG_01783T0	1027	MGG_01783	0.905176	9.19292	2.41957
4	-	671865	673006	MGG_14000T0	972	MGG_14000	0.247401	9.22958	3.03575
5	-	709710	711666	MGG_11447T0	1610	MGG_11447	0.432293	9.24945	2.83915
6	+	3942834	3944303	MGG_09839T0	1297	MGG_09839	0.673785	9.35731	2.62946
3	+	2091574	2093736	MGG_05951T0	2163	MGG_05951	0.026921	9.38448	3.33803
3	+	3039721	3041648	MGG_05807T0	1703	MGG_05807	1.73551	9.4476	1.93329
1	+	1322719	1324224	MGG_02308T0	1413	MGG_02308	0.094394	9.47051	3.25813
7	-	1138048	1139846	MGG_12569T0	1683	MGG_12569	0.174696	9.5081	3.16114
3	-	4336173	4337422	MGG_05023T0	1059	MGG_05023	0.073567	9.55093	3.29689
1	-	2728341	2734242	MGG_11860T0	5684	MGG_11860	1.12216	9.72861	2.33786
3	+	2616015	2617379	MGG_06113T0	1300	MGG_06113	0.135746	9.78228	3.24695
4	+	3328063	3332119	MGG_06547T0	3983	MGG_06547	0.697357	9.86973	2.67895
4	+	2619733	2622838	MGG_03229T0	3106	MGG_03229	0.532381	9.87791	2.82755
1	-	7019404	7021069	MGG_04638T0	1466	MGG_04638	0.563396	9.89122	2.80041
2	-	2018970	2020487	MGG_08892T0	1518	MGG_08892	0.079181	10.0791	3.35983
2	+	4435248	4436969	MGG_01675T0	1389	MGG_01675	1.41508	10.121	2.20314
2	+	1125073	1128149	MGG_04646T0	2915	MGG_04646	1.62177	10.1826	2.09265
4	-	5295177	5296208	MGG_09756T0	1032	MGG_09756	0.100828	10.2138	3.34861
4	+	1235415	1237835	MGG_13497T0	2244	MGG_13497	1.84836	10.3608	1.99587
5	+	2620622	2622737	MGG_00517T0	1672	MGG_00517	1.06001	10.4941	2.48017
3	+	4113190	4116021	MGG_12962T0	2832	MGG_12962	0.218742	10.6162	3.25267
6	+	3254829	3256061	MGG_17776T0	1233	MGG_17776	2.08295	10.6301	1.91548
7	-	708677	709335	MGG_17894T0	471	MGG_17894	2.62495	10.8574	1.70976
1	+	6099115	6100762	MGG_05681T0	1568	MGG_05681	1.33241	11.0939	2.37439
5	-	337237	340028	MGG_01147T0	2482	MGG_01147	0.960979	11.2178	2.63934
1	-	5814819	5816026	MGG_05603T0	1208	MGG_05603	0.629588	11.4783	2.93685
3	-	4049286	4051736	MGG_16834T0	2451	MGG_16834	1.47988	11.5569	2.34014
2	+	3510329	3513125	MGG_01434T0	2665	MGG_01434	1.48979	11.6848	2.34901
7	-	3265194	3267282	MGG_09601T0	2004	MGG_09601	0.325016	11.8713	3.28008
1	-	7479216	7481077	MGG_16531T0	1705	MGG_16531	1.53354	11.9687	2.3558
5	+	3883740	3884843	MGG_00166T0	1104	MGG_00166	0.024436	12.0527	3.67145
7	+	2737319	2739594	MGG_10601T0	2183	MGG_10601	2.7723	12.1479	1.80131
3	+	2744384	2745890	MGG_06149T0	1389	MGG_06149	0.280239	12.205	3.3666
3	-	1254592	1257384	MGG_13438T0	2593	MGG_13438	3.34677	12.2468	1.60763
4	-	2595171	2598360	MGG_03235T0	3190	MGG_03235	0.08011	12.4193	3.63506
1	-	5983799	5989432	MGG_05652T0	5487	MGG_05652	2.84183	12.5838	1.82202
2	-	6676473	6679702	MGG_12371T0	3042	MGG_12371	1.66713	12.6131	2.35164
4	+	1425967	1428920	MGG_13527T0	2954	MGG_13527	0.180274	12.6448	3.53116
5	+	270204	275688	MGG_10955T0	4988	MGG_10955	1.50619	12.7347	2.45425
2	+	7958997	7961109	MGG_12474T0	2113	MGG_12474	0	12.95	3.80219
3	+	2132691	2133814	MGG_05962T0	997	MGG_05962	2.91282	13.0547	1.84477
6	-	2599353	2600273	MGG_03916T0	921	MGG_03916	0.094309	13.0663	3.68415
3	-	4649509	4652039	MGG_05115T0	1900	MGG_05115	1.20487	13.0931	2.67623
1	-	2120061	2123021	MGG_02501T0	2961	MGG_02501	2.02348	13.2211	2.23375
5	+	845360	846658	MGG_01007T0	1299	MGG_01007	0.118263	13.3193	3.67863
5	+	778033	780220	MGG_01021T0	2033	MGG_01021	2.17106	13.3611	2.17913
4	-	2030702	2031373	MGG_03398T0	672	MGG_03398	0.032332	13.4683	3.80892
2	+	4681640	4684476	MGG_01747T0	2607	MGG_01747	1.68178	13.6066	2.44535
1	+	2468970	2472122	MGG_06706T0	3153	MGG_06706	0.448188	13.6788	3.34142
2	-	6436286	6438358	MGG_07121T0	2073	MGG_07121	1.09469	13.7306	2.81401
7	-	700787	702708	MGG_02998T0	1845	MGG_02998	0.091101	13.7726	3.75906
3	+	4890987	4891670	MGG_05187T0	336	MGG_05187	0.074083	13.8079	3.78519
2	+	4787456	4791081	MGG_01776T0	3484	MGG_01776	0.152719	13.8317	3.68557
5	+	4205127	4207681	MGG_00076T0	2460	MGG_00076	0.844912	13.8933	3.01304
4	+	1610620	1611102	MGG_03520T0	348	MGG_03520	0.120945	13.933	3.73572
1	-	6897228	6898247	MGG_13774T0	1020	MGG_13774	0.283336	13.9503	3.5422
3	-	1245748	1246209	MGG_07623T0	366	MGG_07623	3.08969	14.0705	1.88167
3	-	4530291	4531895	MGG_16862T0	1419	MGG_16862	3.54179	14.0764	1.73096
3	+	4258537	4268617	MGG_05002T0	9601	MGG_05002	2.52088	14.2132	2.11131
5	-	1536987	1537784	MGG_14657T0	798	MGG_14657	0.05195	14.3023	3.86261
5	+	328442	333041	MGG_01150T0	4411	MGG_01150	0.83794	14.362	3.06321
2	+	4124965	4127729	MGG_01594T0	2315	MGG_01594	2.32715	14.3915	2.20977
4	+	4245446	4249371	MGG_12862T0	3539	MGG_12862	0.297513	14.4387	3.57273
7	-	66108	68154	MGG_10334T0	2047	MGG_10334	3.34325	14.6424	1.84861
2	+	6528599	6530219	MGG_07143T0	1380	MGG_07143	1.19786	14.6753	2.83432
5	-	685784	688001	MGG_01047T0	2049	MGG_01047	3.58651	14.8261	1.78684
6	-	2710320	2714471	MGG_17732T0	3995	MGG_17732	0.065525	14.9371	3.90276
2	-	5572691	5573935	MGG_08064T0	1245	MGG_08064	0.023954	15.4436	4.00531
5	-	679635	681715	MGG_01049T0	1889	MGG_01049	1.92787	15.4502	2.49018
7	-	1882742	1885450	MGG_02691T0	2535	MGG_02691	0	15.4566	4.0406
3	-	4645646	4647650	MGG_05114T0	1851	MGG_05114	0.172976	15.748	3.83575
2	-	5145992	5146749	MGG_01864T0	758	MGG_01864	1.32025	15.8355	2.85916
2	+	5718395	5719688	MGG_15817T0	1294	MGG_15817	1.49982	15.8386	2.75187
7	+	2788132	2791667	MGG_10590T0	3362	MGG_10590	2.4032	16.0499	2.3248
4	-	2908443	2913273	MGG_03144T0	4698	MGG_03144	0	16.2134	4.10546
5	-	1435257	1436601	MGG_00839T0	1101	MGG_00839	0.026509	16.2367	4.06966
4	+	2580729	2582975	MGG_12745T0	2247	MGG_12745	0.484039	16.3076	3.5438
5	-	1527679	1528812	MGG_00812T0	1134	MGG_00812	1.35254	16.3229	2.88039
2	+	2910107	2911513	MGG_01270T0	1109	MGG_01270	4.55247	16.3503	1.64376
3	-	4325612	4327654	MGG_05017T0	1896	MGG_05017	3.15614	16.5954	2.08189
2	-	2340141	2342477	MGG_08974T0	2337	MGG_08974	1.49901	16.6703	2.8219
5	+	2510121	2511940	MGG_00548T0	1475	MGG_00548	0.560501	16.8279	3.51406
6	-	2023493	2025658	MGG_04082T0	2166	MGG_04082	0.203449	17.0189	3.90426
1	-	3327120	3327581	MGG_06942T0	462	MGG_06942	0.07581	17.0282	4.06676
1	-	6031318	6036463	MGG_05664T0	4886	MGG_05664	2.85406	17.2092	2.24022
1	+	3339625	3341942	MGG_16220T0	2106	MGG_16220	3.27179	17.2598	2.09575
5	-	2622431	2623634	MGG_17439T0	1098	MGG_17439	3.10609	17.4299	2.16621
4	-	2649111	2653139	MGG_03220T0	3779	MGG_03220	2.45977	17.6007	2.42661
5	-	2285012	2286626	MGG_00613T0	1615	MGG_00613	0.111699	17.6399	4.06756
1	+	1580505	1581438	MGG_02372T0	934	MGG_02372	2.79993	17.6747	2.29704
1	+	3650291	3653451	MGG_09184T0	2711	MGG_09184	0	18.1226	4.2572
5	+	856926	858329	MGG_01002T0	1281	MGG_01002	0.062546	18.1986	4.1754
5	-	3961190	3963639	MGG_00143T0	2383	MGG_00143	1.98318	18.4251	2.703
1	-	3294359	3297081	MGG_06932T0	2472	MGG_06932	4.88408	18.5203	1.73008
2	-	1483908	1487292	MGG_04819T0	3309	MGG_04819	0	18.6953	4.29978
5	-	210517	211831	MGG_17308T1	1136	MGG_17308	2.52924	18.7886	2.48724
3	-	862390	863198	MGG_07505T0	809	MGG_07505	2.67452	18.8656	2.43465
1	+	7599457	7602779	MGG_08623T0	3323	MGG_08623	3.0614	18.9123	2.29361
3	-	1692163	1693997	MGG_05844T0	1690	MGG_05844	5.05528	18.9348	1.71902
5	-	3955477	3957126	MGG_00146T0	1650	MGG_00146	3.08056	18.9701	2.291
1	-	3291689	3293662	MGG_06931T0	1974	MGG_06931	0.488176	18.9848	3.74729
3	+	5225064	5226952	MGG_05269T0	1746	MGG_05269	0.048083	19.1557	4.26536
6	+	1466526	1472493	MGG_04235T0	5968	MGG_04235	0.105428	19.3972	4.2057
2	+	4302487	4305223	MGG_01641T0	2497	MGG_01641	4.9492	19.5162	1.78599
3	+	1759499	1761768	MGG_05860T0	2270	MGG_05860	1.95383	19.6654	2.80656
2	-	3136395	3139048	MGG_11229T0	2190	MGG_11229	0.063988	19.6916	4.28149
3	+	4469203	4474252	MGG_05065T0	4960	MGG_05065	0.220459	19.9237	4.09964
3	-	2538694	2540039	MGG_06089T0	1346	MGG_06089	3.66077	20.2622	2.18965
4	+	1198645	1200784	MGG_03630T0	2058	MGG_03630	2.71639	20.2938	2.51846
2	-	4790943	4795268	MGG_01777T0	4248	MGG_01777	3.97678	20.5542	2.11469
2	-	4910533	4912211	MGG_01806T0	1503	MGG_01806	5.37344	20.8763	1.77922
5	+	2232562	2236030	MGG_00623T0	2996	MGG_00623	4.59344	20.9311	1.97117
4	+	3382980	3385220	MGG_12804T0	2241	MGG_12804	1.3218	21.2018	3.25736
3	-	2307470	2308989	MGG_06023T0	1395	MGG_06023	0.045156	21.327	4.417
1	-	6026510	6028054	MGG_05662T0	1545	MGG_05662	1.23787	21.3917	3.32276
4	-	3307415	3308536	MGG_06556T0	921	MGG_06556	1.41757	21.5117	3.21904
2	+	465646	467128	MGG_10382T0	1243	MGG_10382	1.68255	21.5268	3.06996
2	+	5807764	5810895	MGG_08133T0	3052	MGG_08133	1.45703	21.8911	3.2198
2	-	1124119	1124649	MGG_04645T0	384	MGG_04645	1.0933	21.9691	3.45585
5	-	2278134	2282947	MGG_11541T0	4512	MGG_11541	6.45174	22.3258	1.64628
7	-	703632	704230	MGG_02997T0	480	MGG_02997	0.330989	22.4554	4.13935
2	-	5716718	5717820	MGG_08108T0	1103	MGG_08108	3.38223	22.6599	2.43271
4	+	1039521	1040890	MGG_03679T0	1280	MGG_03679	3.15837	22.7292	2.51257
2	+	3061777	3063551	MGG_01310T0	1775	MGG_01310	3.49359	22.8155	2.40596
2	-	4857595	4859133	MGG_15768T0	1411	MGG_15768	2.32327	22.848	2.84319
2	-	2010791	2013259	MGG_08890T0	2469	MGG_08890	3.9283	22.8585	2.27534
1	-	2410465	2410709	MGG_14582T0	183	MGG_14582	0.107933	23.1238	4.44452
3	+	2857328	2859272	MGG_06184T0	1780	MGG_06184	3.77284	23.4207	2.35518
6	-	3833432	3834901	MGG_17830T0	1371	MGG_17830	4.53734	23.5422	2.148
2	+	6615699	6617917	MGG_15868T0	1692	MGG_15868	0.639557	23.6376	3.90948
1	+	3678990	3683856	MGG_09190T0	4506	MGG_09190	5.11971	23.6462	2.00983
2	-	881512	885018	MGG_04517T0	3415	MGG_04517	0.678272	23.8956	3.89084
1	+	2543568	2547024	MGG_06733T0	3154	MGG_06733	3.63317	24.2463	2.446
3	-	6148907	6150000	MGG_07884T0	1026	MGG_07884	1.59106	24.4962	3.29867
4	-	3564444	3566181	MGG_06485T0	1738	MGG_06485	4.52635	24.5235	2.20742
3	-	735220	738247	MGG_07465T0	2920	MGG_07465	3.00377	24.9132	2.69426
4	+	884946	886686	MGG_03733T0	1741	MGG_03733	1.32813	25.0107	3.48186
4	-	4017512	4020780	MGG_12849T0	3193	MGG_12849	6.85506	25.6546	1.76269
1	+	5447689	5450158	MGG_05501T0	2271	MGG_05501	5.89949	25.7227	1.9535
1	-	3804414	3805681	MGG_09216T0	1091	MGG_09216	3.09409	25.8062	2.71095
3	+	2295956	2298354	MGG_06020T0	2258	MGG_06020	1.87933	25.8594	3.22162
5	+	2143666	2144900	MGG_00646T0	1146	MGG_00646	5.09518	25.9562	2.14488
7	-	323609	325998	MGG_03095T0	2390	MGG_03095	2.136	26.1409	3.11347
1	+	3200147	3201705	MGG_06903T0	1480	MGG_06903	0.584709	26.4541	4.11473
4	+	899873	901396	MGG_03728T0	1252	MGG_03728	2.3893	26.786	3.0353
5	+	1997991	2000740	MGG_00685T0	2431	MGG_00685	3.6325	26.811	2.58579
4	-	1603504	1605634	MGG_03522T0	1730	MGG_03522	6.54957	26.9481	1.88828
2	-	3593874	3597754	MGG_01458T0	3529	MGG_01458	0	27.0484	4.80985
4	-	2722275	2724179	MGG_03199T0	1619	MGG_03199	2.57599	27.1622	2.97735
6	-	2607629	2608432	MGG_17729T0	804	MGG_17729	0.07236	27.1968	4.71667
2	+	5064518	5066536	MGG_01842T0	2019	MGG_01842	6.47855	27.3562	1.92283
3	+	2301335	2307324	MGG_06022T0	5521	MGG_06022	3.39328	27.4243	2.69376
1	+	7130476	7131483	MGG_04595T1	850	MGG_04595	0.040312	27.7233	4.78714
1	+	2161002	2162516	MGG_02511T0	1515	MGG_02511	3.69899	27.9518	2.62323
2	-	7677474	7679445	MGG_08368T0	1761	MGG_08368	6.83588	28.5629	1.91562
2	+	2804239	2805557	MGG_01239T0	1319	MGG_01239	4.53061	28.5717	2.4187
4	+	3424404	3426606	MGG_06522T0	2126	MGG_06522	5.68332	28.6003	2.14697
5	+	3423331	3424264	MGG_00283T0	848	MGG_00283	0.326163	29.4449	4.52087
5	-	2099590	2104858	MGG_00660T0	4098	MGG_00660	7.83604	29.8412	1.80339
2	+	4445595	4446215	MGG_11169T0	339	MGG_11169	4.96298	30.0468	2.38034
2	+	7325815	7329056	MGG_15090T0	2901	MGG_15090	0.220775	30.4475	4.68707
2	-	6261838	6263143	MGG_15075T0	1243	MGG_15075	0.59623	32.0879	4.37356
2	+	6498520	6501715	MGG_07136T0	2801	MGG_07136	1.21033	32.0884	3.904
5	+	1865046	1867171	MGG_17385T0	2038	MGG_17385	4.91675	32.1395	2.48568
2	+	427034	428288	MGG_10496T0	1091	MGG_10496	0.514749	32.3213	4.45929
6	+	3361408	3365208	MGG_09413T0	3801	MGG_09413	1.6748	33.1245	3.6733
7	+	225599	227599	MGG_10289T0	1944	MGG_10289	0.582057	33.2229	4.43509
2	-	6700516	6702213	MGG_07191T0	1698	MGG_07191	1.17722	33.3086	3.97801
1	-	1670159	1673032	MGG_11919T0	2794	MGG_11919	2.17874	33.579	3.44337
4	-	1866045	1868367	MGG_03438T0	2139	MGG_03438	0.680316	33.7606	4.37065
2	-	1587004	1589432	MGG_14751T0	2063	MGG_14751	5.3278	33.8298	2.46054
4	+	1058314	1059107	MGG_03674T0	794	MGG_03674	10.4212	33.8983	1.61144
6	+	1921996	1923418	MGG_04113T0	1423	MGG_04113	7.01227	34.4205	2.1443
1	-	2638446	2640911	MGG_06764T0	2350	MGG_06764	6.47583	34.5333	2.24887
1	+	7007368	7007529	MGG_13787T0	162	MGG_13787	0.054557	35.1877	5.10079
7	-	512235	513759	MGG_17878T0	1358	MGG_17878	1.58879	35.571	3.82035
4	-	3874572	3877088	MGG_06398T0	2420	MGG_06398	1.84295	35.6159	3.68701
2	-	1582522	1586723	MGG_10127T0	4000	MGG_10127	2.40617	35.788	3.43301
6	+	3787174	3788841	MGG_14293T0	1459	MGG_14293	5.88476	36.1259	2.43095
2	-	3887125	3888480	MGG_01519T0	1284	MGG_01519	9.55058	36.1745	1.81699
1	-	1128394	1129982	MGG_02247T0	1475	MGG_02247	9.23503	36.6192	1.87795
3	+	1882803	1884944	MGG_05901T0	1945	MGG_05901	0.276736	36.8363	4.88924
6	-	3658407	3660362	MGG_09330T0	1860	MGG_09330	5.18281	36.9005	2.61588
2	+	7257838	7263059	MGG_12403T0	5222	MGG_12403	0.974107	37.099	4.27048
4	+	3418857	3423428	MGG_06524T0	4071	MGG_06524	11.33	37.4826	1.64203
7	+	1581954	1583482	MGG_02770T0	1280	MGG_02770	7.63322	37.5351	2.1582
2	-	4163759	4166300	MGG_01604T0	2440	MGG_01604	9.31869	38.1121	1.92235
7	-	2646350	2647960	MGG_09029T0	1529	MGG_09029	11.541	38.3215	1.64866
5	-	3663453	3664810	MGG_00210T0	1358	MGG_00210	11.3706	38.5934	1.67834
4	+	4261554	4262131	MGG_06294T0	492	MGG_06294	5.92041	38.9081	2.52775
4	-	2021545	2022399	MGG_12708T0	855	MGG_12708	0.073733	39.3322	5.23122
5	+	1707468	1709717	MGG_17371T0	1970	MGG_17371	3.35637	39.6198	3.22098
1	-	6829976	6831205	MGG_14540T0	1109	MGG_14540	0.301885	39.8796	4.97271
3	+	3494895	3499625	MGG_09493T0	4237	MGG_09493	4.27389	41.0756	2.99604
2	+	4130753	4133222	MGG_01596T1	2070	MGG_01596	4.23224	41.1947	3.01156
5	-	1005738	1007354	MGG_00956T0	1536	MGG_00956	5.94939	41.7874	2.62223
2	+	4732946	4735358	MGG_01760T0	2335	MGG_01760	0.74332	41.8659	4.61992
6	-	3989784	3994840	MGG_17841T0	3915	MGG_17841	6.02413	42.1249	2.61813
4	-	5062801	5064075	MGG_09986T0	1205	MGG_09986	12.4607	42.2743	1.68476
5	-	501837	503077	MGG_01104T0	1163	MGG_01104	5.77947	42.75	2.69004
5	-	592874	595452	MGG_11440T0	2579	MGG_11440	4.43576	43.7444	3.04115
7	-	95147	98810	MGG_14219T0	3147	MGG_14219	1.99105	44.2892	3.92044
2	-	3373153	3376687	MGG_01393T0	3317	MGG_01393	7.57718	44.4435	2.4055
4	-	859213	860563	MGG_03740T0	1179	MGG_03740	5.56375	44.6752	2.79882
2	-	4534535	4536466	MGG_01708T0	1932	MGG_01708	5.72216	45.3985	2.78708
3	+	2100518	2103292	MGG_16721T0	2775	MGG_16721	0.518073	47.2367	4.98982
5	+	4034549	4035877	MGG_14719T0	1329	MGG_14719	0.06712	47.8268	5.51588
3	-	4491891	4492289	MGG_16856T0	207	MGG_16856	2.71138	48.1495	3.72715
6	-	3788671	3790001	MGG_10697T0	1102	MGG_10697	12.8886	49.089	1.85059
1	+	3846315	3850176	MGG_16251T0	3487	MGG_16251	6.44708	51.7787	2.82521
2	-	6505941	6511534	MGG_15861T0	5483	MGG_15861	5.5611	54.2105	3.07293
2	+	4914566	4916455	MGG_15774T0	1645	MGG_15774	5.5416	54.4804	3.08426
4	+	1693552	1695913	MGG_03492T0	2039	MGG_03492	2.64688	56.0718	3.96805
6	+	2493822	2494868	MGG_17721T0	963	MGG_17721	2.48452	56.1791	4.03646
5	-	560715	562381	MGG_01086T0	1507	MGG_01086	11.7333	58.1072	2.21473
3	+	797067	798855	MGG_13401T0	1715	MGG_13401	18.7598	58.4729	1.58967
1	-	4110017	4110283	MGG_14629T0	267	MGG_14629	0.052243	58.9682	5.83266
5	-	4254934	4258034	MGG_00062T0	2916	MGG_00062	7.46927	58.992	2.82446
4	+	1580529	1584837	MGG_03530T0	3376	MGG_03530	2.6272	59.7081	4.06496
2	+	7086796	7088679	MGG_15895T0	1478	MGG_15895	11.8067	61.27	2.28164
3	-	3404532	3406157	MGG_09520T0	1512	MGG_09520	19.5071	61.8118	1.61491
2	+	8054783	8057855	MGG_08270T0	2873	MGG_08270	4.37887	62.2122	3.55483
3	+	3616387	3619852	MGG_11021T0	3466	MGG_11021	22.0174	68.9035	1.60264
3	+	6193571	6194293	MGG_07901T0	639	MGG_07901	5.39598	69.1975	3.45618
1	+	7481334	7485376	MGG_04396T0	3648	MGG_04396	8.11186	74.2189	3.04528
6	-	447975	449133	MGG_08691T0	949	MGG_08691	11.7333	74.3304	2.56462
1	+	3214892	3216202	MGG_06907T0	915	MGG_06907	7.30827	75.3349	3.19972
7	-	998734	1002573	MGG_02927T0	3162	MGG_02927	0.113812	80.6687	6.19621
4	-	3906682	3908765	MGG_06392T0	1943	MGG_06392	0.435019	84.3336	5.89397
3	-	2641292	2645365	MGG_06121T0	4074	MGG_06121	6.80522	85.0355	3.46242
2	-	2662102	2663480	MGG_01208T0	1090	MGG_01208	0.066913	85.4174	6.33981
3	+	3491786	3493369	MGG_09495T0	1311	MGG_09495	25.6126	87.5001	1.73357
6	+	3735691	3736852	MGG_10716T0	1162	MGG_10716	1.4571	88.2105	5.18219
5	+	1622311	1624307	MGG_00786T0	1904	MGG_00786	14.827	90.4556	2.53068
3	-	777558	781107	MGG_07479T0	3269	MGG_07479	2.8235	92.0116	4.60444
2	-	3090898	3093197	MGG_15671T0	2204	MGG_15671	22.444	93.4406	2.01019
1	-	7698079	7699950	MGG_08656T0	1815	MGG_08656	15.104	98.0269	2.6204
7	+	1921305	1924516	MGG_15018T0	3121	MGG_15018	19.0515	101.433	2.3529
2	-	4382395	4383395	MGG_01663T0	933	MGG_01663	0.214786	102.16	6.40804
5	-	944222	946166	MGG_00978T0	1711	MGG_00978	18.3725	102.316	2.41498
4	-	4036389	4039637	MGG_06358T0	3076	MGG_06358	21.4674	102.33	2.20136
2	+	4402100	4404484	MGG_01671T0	2111	MGG_01671	24.936	105.348	2.03576
4	+	3580113	3582782	MGG_06482T0	2245	MGG_06482	0.070209	106.858	6.6551
4	+	217232	219736	MGG_08440T0	2505	MGG_08440	3.6647	110.226	4.57557
1	+	877826	878863	MGG_16053T0	805	MGG_16053	4.27894	112.456	4.42574
1	-	3130730	3133497	MGG_06888T0	1700	MGG_06888	12.6411	112.793	3.06038
1	-	3644340	3645575	MGG_09181T0	1119	MGG_09181	0.04381	119.911	6.85594
1	+	6446999	6448010	MGG_05766T0	864	MGG_05766	10.0706	123.044	3.48604
7	+	312682	313415	MGG_15036T0	654	MGG_15036	0.237488	124.48	6.6639
7	-	1662236	1663024	MGG_02752T0	789	MGG_02752	0.561036	124.618	6.33039
1	+	472722	473859	MGG_02069T0	980	MGG_02069	6.0376	126.684	4.18135
2	+	3282621	3283791	MGG_01367T0	672	MGG_01367	14.2315	127.694	3.07881
3	-	4467725	4468877	MGG_05064T0	900	MGG_05064	41.4498	128.033	1.60391
1	+	2505298	2507870	MGG_06720T0	2015	MGG_06720	6.83328	129.568	4.05904
3	+	4740183	4741469	MGG_05143T0	1233	MGG_05143	51.4554	159.394	1.61246
4	-	270731	272825	MGG_13947T0	2032	MGG_13947	47.2196	165.342	1.78646
1	+	6331751	6332193	MGG_05737T0	330	MGG_05737	8.23813	183.26	4.318
5	-	1129028	1131346	MGG_00923T0	2107	MGG_00923	39.4213	187.513	2.22147
3	+	3247636	3249063	MGG_09567T0	1363	MGG_09567	5.10894	198.922	5.03237
5	+	988835	989559	MGG_00962T0	651	MGG_00962	11.3417	223.747	4.18669
4	+	3592126	3592799	MGG_06479T0	393	MGG_06479	0.681329	252.318	7.2352
1	+	3114383	3116033	MGG_16201T0	1124	MGG_16201	28.9963	269.468	3.1726
1	+	2791431	2792395	MGG_06800T0	897	MGG_06800	86.2148	271.071	1.64134
6	-	2222187	2225464	MGG_04017T0	3176	MGG_04017	7.59381	279.269	5.02737
4	+	5011163	5011894	MGG_09996T0	672	MGG_09996	47.4779	314	2.69995
8	+	162506	163754	MGG_10930T0	1061	MGG_10930	108.458	333.932	1.61349
3	+	4137051	4137541	MGG_04977T0	156	MGG_04977	0.057564	460.541	8.76957
3	+	4022427	4023882	MGG_04941T0	1070	MGG_04941	108.659	471.27	2.10659
3	+	6277642	6278438	MGG_07929T0	360	MGG_07929	0.054172	485.648	8.85063
1	+	1753495	1755243	MGG_02410T0	1622	MGG_02410	125.619	731.215	2.53177
1	+	5631875	5632201	MGG_15150T0	327	MGG_15150	161.297	830.958	2.35788
4	-	4262442	4263505	MGG_06293T0	786	MGG_06293	6.17732	843.066	6.87777
2	+	3558789	3561085	MGG_15700T0	2138	MGG_15700	181.445	1115.31	2.6132
6	+	50022	51262	MGG_08811T0	1241	MGG_08811	300.747	1141.12	1.9203
6	-	4019556	4020891	MGG_09816T0	1271	MGG_09816	7.94566	1227.05	7.10096
1	-	6613906	6615688	MGG_10893T0	1663	MGG_10893	34.0972	1632.62	5.54057
7	+	2074886	2075570	MGG_02647T0	618	MGG_02647	5.64927	7406.78	10.1216
4	-	5006414	5006782	MGG_09998T0	369	MGG_09998	3.27426	10742.8	11.2955

## Sheet: DOWN_DEG
Chromosome	Strand	Start	End	Transcript_id	length	Locus_id	FPKM_KJ201	FPKM_Moeri-1	Log2 foldchange
4	-	375802	376230	MGG_08482T0	429	MGG_08482	2.18981	0	-1.67347
4	+	5023087	5024539	MGG_13619T0	1453	MGG_13619	2.25611	0.028881	-1.66207
6	+	300627	301166	MGG_08739T0	540	MGG_08739	2.26009	0.069707	-1.6077
6	+	3520849	3521582	MGG_17797T0	657	MGG_17797	2.33379	0	-1.73716
2	-	842738	843713	MGG_04452T0	976	MGG_04452	2.51266	0.066561	-1.7196
2	+	6727067	6729983	MGG_07199T0	2640	MGG_07199	2.67554	0.193358	-1.62293
5	+	4034042	4034455	MGG_14718T0	414	MGG_14718	2.69409	0.071587	-1.78547
4	+	3825146	3826349	MGG_06415T0	1204	MGG_06415	2.78524	0.104862	-1.77652
1	-	3894941	3897461	MGG_09242T0	2233	MGG_09242	2.80002	0.125027	-1.75605
1	-	4898229	4899939	MGG_05348T0	1496	MGG_05348	2.82673	0	-1.93611
4	-	2289740	2292995	MGG_03316T0	2946	MGG_03316	2.90482	0.091097	-1.83948
6	+	3926674	3927237	MGG_09844T0	564	MGG_09844	2.94501	0.202789	-1.71365
2	+	5563237	5565354	MGG_08060T0	1727	MGG_08060	3.0294	0	-2.01057
8	+	405911	409010	MGG_10212T0	2319	MGG_10212	3.09657	0.357967	-1.59297
3	+	1282426	1284166	MGG_13441T0	1536	MGG_13441	3.11972	0.086211	-1.92324
2	+	1607574	1610664	MGG_10147T0	2672	MGG_10147	3.23609	0.251932	-1.75858
8	-	333144	334440	MGG_10245T0	1039	MGG_10245	3.25425	0	-2.08891
4	-	1783808	1784901	MGG_03461T0	898	MGG_03461	3.27759	0.033387	-2.04942
3	+	4323117	4323416	MGG_05016T0	300	MGG_05016	3.31604	0.126102	-1.93837
6	+	330399	333332	MGG_08730T0	2583	MGG_08730	3.32533	0.096882	-1.9794
7	+	2845190	2846819	MGG_10573T0	1473	MGG_10573	3.35945	0.108636	-1.97536
1	+	3516902	3524086	MGG_11779T0	6912	MGG_11779	3.53381	0.457976	-1.63676
6	+	1725757	1727644	MGG_12165T0	1756	MGG_12165	3.59212	0	-2.19916
8	-	399160	401211	MGG_10215T0	1673	MGG_10215	3.61875	0.366407	-1.75711
5	-	2920505	2929876	MGG_00428T0	9097	MGG_00428	3.66375	0.114673	-2.06487
1	+	6564003	6567142	MGG_10630T0	3140	MGG_10630	3.71767	0.247846	-1.91863
5	+	1495368	1496434	MGG_00822T0	912	MGG_00822	3.74959	0.056215	-2.1689
5	-	3477729	3479370	MGG_00265T0	1481	MGG_00265	3.7647	0	-2.25239
4	-	2763266	2771591	MGG_12761T0	7704	MGG_12761	3.76923	0	-2.25376
1	+	2744056	2747329	MGG_06787T0	3148	MGG_06787	3.95236	0.391481	-1.8315
1	-	7731926	7733289	MGG_15413T0	1205	MGG_15413	3.99683	0.055901	-2.24254
5	-	365236	366941	MGG_01138T0	1401	MGG_01138	4.06385	0.340275	-1.91771
2	+	1391365	1392279	MGG_04762T0	915	MGG_04762	4.06683	0.076643	-2.23454
6	+	1718408	1720780	MGG_04172T0	2373	MGG_04172	4.08634	0.058378	-2.26477
1	-	2540924	2543401	MGG_06732T0	2189	MGG_06732	4.30404	0.579278	-1.74783
7	-	2261925	2263438	MGG_02593T0	1065	MGG_02593	4.33014	0.204437	-2.14581
6	+	1990012	2000062	MGG_04093T1	9730	MGG_04093	4.34158	0.737632	-1.62014
3	-	3790626	3791416	MGG_04873T0	603	MGG_04873	4.48205	0.608419	-1.76907
4	-	1697836	1701689	MGG_13542T0	3561	MGG_13542	4.49355	0.194663	-2.20114
2	-	2303982	2305429	MGG_08966T0	1143	MGG_08966	4.53152	0.082584	-2.3532
4	+	372414	373289	MGG_08480T0	876	MGG_08480	4.53975	0.390425	-1.9943
2	+	3284604	3285822	MGG_01368T0	1036	MGG_01368	4.6118	0.270296	-2.1433
2	-	1353514	1354696	MGG_04742T0	1183	MGG_04742	4.68607	0.101854	-2.3675
5	+	2447829	2450855	MGG_00571T0	2599	MGG_00571	4.84066	0.177398	-2.31053
3	-	1268821	1269304	MGG_07630T0	354	MGG_07630	4.87787	0.201137	-2.29089
1	+	1307895	1309244	MGG_02302T0	1350	MGG_02302	4.98887	0.660829	-1.85038
1	+	2561414	2563217	MGG_06738T0	1727	MGG_06738	5.09172	0.263522	-2.2694
1	-	6845945	6847868	MGG_04732T0	1849	MGG_04732	5.09255	0.883618	-1.69354
3	+	1518149	1519142	MGG_07684T0	855	MGG_07684	5.17691	0.195584	-2.36917
6	+	1611012	1611901	MGG_04202T0	890	MGG_04202	5.27202	0.096543	-2.51597
5	-	89326	89793	MGG_17299T0	468	MGG_17299	5.31036	0	-2.65772
2	+	7280293	7281026	MGG_07330T0	537	MGG_07330	5.34045	0.039452	-2.60876
5	+	529758	533733	MGG_01094T0	3784	MGG_01094	5.38246	0.119444	-2.51133
4	-	1802359	1803981	MGG_03456T0	1623	MGG_03456	5.47173	0.498197	-2.11092
5	-	54104	54458	MGG_11003T0	255	MGG_11003	5.51248	0.065814	-2.61125
2	-	5445803	5449425	MGG_15803T0	3507	MGG_15803	5.7284	1.0326	-1.72694
4	-	3848967	3850326	MGG_06404T0	1197	MGG_06404	5.74824	0.493607	-2.17571
1	+	1431571	1433075	MGG_02331T0	1446	MGG_02331	5.83129	0.962429	-1.79952
7	+	2723958	2726610	MGG_09005T0	2563	MGG_09005	5.85872	0.062723	-2.69017
1	-	7644836	7646263	MGG_14268T0	1351	MGG_14268	5.8728	0.870557	-1.87743
2	-	5156977	5159706	MGG_01868T0	2730	MGG_01868	5.92689	0.018717	-2.76546
2	+	1613384	1615065	MGG_10149T0	1396	MGG_10149	5.93361	0.895185	-1.87127
5	-	1927047	1928099	MGG_00703T0	969	MGG_00703	5.983	1.26707	-1.62302
5	-	3516340	3518506	MGG_00253T0	2090	MGG_00253	6.00167	0.189469	-2.55738
2	-	7997015	7999136	MGG_08287T1	1399	MGG_08287	6.16066	0	-2.84009
4	+	2672256	2677894	MGG_12750T0	5639	MGG_12750	6.17726	0.308274	-2.45577
2	-	5518339	5521094	MGG_08045T0	2523	MGG_08045	6.20081	1.08827	-1.78585
4	+	3580848	3583250	MGG_06482T1	2262	MGG_06482	6.20603	0.475308	-2.28819
1	-	7397690	7401628	MGG_04468T0	3850	MGG_04468	6.32246	1.39583	-1.6118
1	-	5498326	5498667	MGG_15174T0	342	MGG_15174	6.50066	0.085366	-2.78884
3	+	1025584	1029673	MGG_07561T0	3894	MGG_07561	6.51687	0.572904	-2.2567
5	-	1220935	1221655	MGG_00892T0	435	MGG_00892	6.53278	0.839355	-2.03398
2	+	6627404	6632514	MGG_07171T0	5032	MGG_07171	6.58538	0	-2.92322
3	+	3091451	3092998	MGG_05787T0	1548	MGG_05787	6.65055	0.979033	-1.95077
2	+	5719616	5722969	MGG_15818T0	3077	MGG_15818	6.672	0	-2.9396
7	+	1207904	1209655	MGG_15006T0	1752	MGG_15006	6.83075	0.136617	-2.7844
6	-	3493899	3498581	MGG_17793T0	4683	MGG_17793	6.86709	0.00575	-2.96756
2	-	3561023	3566794	MGG_01447T0	5772	MGG_01447	6.9026	0.003329	-2.97753
3	+	5075782	5077455	MGG_05230T0	1674	MGG_05230	7.05168	1.65355	-1.60137
4	-	4197097	4201353	MGG_06314T0	4033	MGG_06314	7.18861	1.39314	-1.77471
5	-	1889807	1891543	MGG_00719T0	1737	MGG_00719	7.23229	0.053345	-2.96632
3	-	2469158	2471257	MGG_06069T0	2100	MGG_06069	7.4809	1.51067	-1.75614
3	-	5095869	5100203	MGG_05239T0	4335	MGG_05239	7.53494	0.233699	-2.79039
3	+	3010745	3013622	MGG_05800T0	2579	MGG_05800	7.54031	1.42119	-1.81857
8	+	335501	336147	MGG_10244T0	647	MGG_10244	7.5675	0.393301	-2.62037
3	-	5024521	5029130	MGG_16887T0	4324	MGG_16887	7.79892	0.789623	-2.29767
3	+	4623670	4624305	MGG_05108T0	636	MGG_05108	7.84816	0.298983	-2.76799
1	-	2157444	2158879	MGG_02509T0	1242	MGG_02509	7.84838	0.156148	-2.93609
2	+	3578467	3582284	MGG_01452T0	3746	MGG_01452	8.09715	0.302575	-2.80405
5	+	1795218	1797154	MGG_00743T0	1937	MGG_00743	8.13972	1.61075	-1.80769
1	-	4959442	4960933	MGG_05364T0	1125	MGG_05364	8.15575	0.102509	-3.05389
6	-	341035	345564	MGG_08725T0	4530	MGG_08725	8.32924	1.95586	-1.65818
4	-	2464827	2466379	MGG_03266T0	1357	MGG_03266	8.39567	1.18853	-2.10204
1	+	3050400	3053630	MGG_16195T0	3120	MGG_16195	8.4034	1.24586	-2.06591
1	+	6558910	6561181	MGG_14302T0	2217	MGG_14302	8.5428	1.31216	-2.04517
3	+	4334952	4335979	MGG_05022T0	966	MGG_05022	8.5803	0.062146	-3.17309
3	+	4779502	4781973	MGG_12929T0	2128	MGG_12929	8.58554	0.069397	-3.16406
2	-	671170	673157	MGG_04375T0	1988	MGG_04375	8.60484	0.739747	-2.46488
6	+	3602886	3604019	MGG_09347T0	950	MGG_09347	8.77152	0.586459	-2.62277
1	-	1151431	1152448	MGG_16077T0	900	MGG_16077	8.81874	0.097667	-3.1611
4	+	2392281	2396575	MGG_03286T0	4295	MGG_03286	8.84449	2.2199	-1.6123
3	+	1271636	1273125	MGG_07631T0	1490	MGG_07631	8.88652	1.40289	-2.04069
2	-	4156283	4158504	MGG_14800T0	2222	MGG_14800	8.92035	0.091192	-3.18449
4	+	788364	792595	MGG_08590T0	4023	MGG_08590	9.02375	0	-3.32535
3	+	4732648	4734067	MGG_15131T0	1347	MGG_15131	9.05501	0.039146	-3.27444
1	+	5264205	5264702	MGG_05452T0	498	MGG_05452	9.09695	1.65143	-1.92907
1	+	4506084	4510456	MGG_09960T0	3938	MGG_09960	9.17514	1.5793	-1.98
3	+	811980	813592	MGG_07489T0	1393	MGG_07489	9.42715	2.19363	-1.70707
7	-	2466789	2468663	MGG_02534T0	1875	MGG_02534	9.44602	0.227925	-3.08866
1	-	407927	410609	MGG_16021T0	2461	MGG_16021	9.4878	0	-3.39064
3	+	3781003	3782517	MGG_04869T0	1011	MGG_04869	9.5435	0.189796	-3.14757
4	+	3829131	3831010	MGG_06413T0	1880	MGG_06413	9.59576	0.01944	-3.37764
6	+	3663287	3665333	MGG_17812T0	1969	MGG_17812	9.63212	1.39959	-2.14757
3	-	4663495	4665018	MGG_05120T0	1452	MGG_05120	9.75653	1.53944	-2.08263
1	+	3844946	3846348	MGG_16250T0	1403	MGG_16250	9.78766	0.324339	-3.02604
1	-	2199869	2200389	MGG_02522T0	438	MGG_02522	9.80234	0.073446	-3.33102
1	-	6286495	6289627	MGG_15163T0	2882	MGG_15163	9.939	0	-3.45141
1	-	2196230	2198433	MGG_11885T0	2127	MGG_11885	9.95017	0.081009	-3.3405
3	-	2153114	2154612	MGG_15233T0	1413	MGG_15233	10.0323	2.20418	-1.78371
2	-	6913912	6915094	MGG_15885T0	1095	MGG_15885	10.2339	0.912795	-2.55411
1	-	4132599	4136282	MGG_16277T0	3684	MGG_16277	10.4738	2.0965	-1.88963
6	-	4082574	4085142	MGG_09798T0	2441	MGG_09798	10.7265	1.34377	-2.32287
1	+	5538177	5539668	MGG_15176T0	1492	MGG_15176	10.8276	0.343607	-3.13797
6	+	53066	54893	MGG_08809T0	1828	MGG_08809	10.9377	0.201979	-3.31205
3	+	2049271	2051175	MGG_05941T0	1796	MGG_05941	11.039	0.790218	-2.74951
6	+	3778476	3779591	MGG_10701T0	1116	MGG_10701	11.0521	0.065498	-3.49969
4	-	1023756	1024784	MGG_03685T0	1029	MGG_03685	11.1016	1.90814	-2.05703
3	-	700945	704665	MGG_07457T0	3239	MGG_07457	11.5015	2.17396	-1.97775
6	+	1397831	1399711	MGG_04257T0	1881	MGG_04257	11.5927	1.36382	-2.4134
6	-	2913105	2914934	MGG_03825T0	1617	MGG_03825	11.8308	2.17851	-2.01319
4	-	95758	101034	MGG_15344T0	5163	MGG_15344	12.0516	2.68797	-1.82333
2	+	3129599	3132711	MGG_01331T0	2888	MGG_01331	12.0815	2.45115	-1.92238
4	+	3667028	3671660	MGG_06457T0	4142	MGG_06457	12.101	3.34302	-1.5929
4	+	1406756	1407127	MGG_03575T0	372	MGG_03575	12.3289	2.02567	-2.13923
2	+	4443537	4445418	MGG_01680T0	1882	MGG_01680	12.544	0.436397	-3.23713
1	+	2070788	2072577	MGG_02492T0	1790	MGG_02492	12.5628	1.72743	-2.31404
4	-	2212381	2213432	MGG_03338T0	961	MGG_03338	12.6625	1.49846	-2.45112
3	-	761569	762654	MGG_07474T0	1086	MGG_07474	12.7743	1.73887	-2.33033
5	-	3404247	3406595	MGG_11608T0	2244	MGG_11608	13.0302	1.35137	-2.57697
6	-	673175	675032	MGG_17595T0	1858	MGG_17595	13.0844	1.4581	-2.51848
3	+	4925336	4928445	MGG_05198T0	3047	MGG_05198	13.0919	2.27746	-2.10421
6	-	1150793	1152372	MGG_04331T0	1423	MGG_04331	13.0935	3.6246	-1.60762
3	-	3560428	3562281	MGG_16805T0	1854	MGG_16805	13.181	0.060392	-3.74129
4	-	922429	924123	MGG_03720T0	1559	MGG_03720	13.3828	2.10631	-2.21107
1	-	4412652	4414743	MGG_16301T0	2092	MGG_16301	13.4795	0.682813	-3.10507
3	+	5552173	5554867	MGG_07731T0	2493	MGG_07731	13.6554	0.875149	-2.96635
1	+	1456213	1457604	MGG_02340T0	1218	MGG_02340	13.8136	2.42203	-2.114
2	+	6353239	6355680	MGG_07097T0	2287	MGG_07097	13.8934	1.88078	-2.37014
4	-	1264887	1266683	MGG_03613T0	1519	MGG_03613	13.8992	2.05573	-2.28564
4	+	5033571	5036056	MGG_13622T0	2486	MGG_13622	14.0229	1.67369	-2.49026
8	-	331122	332351	MGG_14184T0	1045	MGG_14184	14.1138	2.50369	-2.10892
3	-	2760379	2764152	MGG_06155T0	3628	MGG_06155	14.3762	4.01105	-1.61752
3	-	2962964	2967147	MGG_06214T0	4184	MGG_06214	14.5281	1.09041	-2.89302
1	+	172286	177150	MGG_01996T1	4656	MGG_01996	14.5672	4.08697	-1.61363
4	+	1611648	1613798	MGG_03519T0	2151	MGG_03519	14.7007	0.123112	-3.80526
2	-	3188497	3190808	MGG_01345T0	2025	MGG_01345	14.775	3.28273	-1.88104
1	+	3714385	3716598	MGG_11771T0	2014	MGG_11771	14.9036	1.32316	-2.77519
2	+	5289802	5290260	MGG_15793T0	459	MGG_15793	15.0166	0.763184	-3.18331
2	+	5080299	5081819	MGG_01847T0	1521	MGG_01847	15.0851	0.000448	-4.007
4	-	5386445	5387268	MGG_09722T0	618	MGG_09722	15.1479	0.043661	-3.95162
1	+	7437668	7439432	MGG_04419T0	1620	MGG_04419	15.402	0.094784	-3.90515
5	+	4282254	4284691	MGG_00053T0	2438	MGG_00053	15.4289	4.35779	-1.61653
2	-	7776963	7780014	MGG_08339T0	2534	MGG_08339	15.5056	2.49098	-2.24125
5	+	1565999	1567594	MGG_00802T0	1479	MGG_00802	15.6544	4.00356	-1.73488
2	-	2331152	2332099	MGG_08971T0	787	MGG_08971	15.7453	0.974037	-3.08454
2	-	1748146	1751096	MGG_10200T0	2577	MGG_10200	15.8267	0.09264	-3.94486
3	-	3947856	3953394	MGG_04917T0	4813	MGG_04917	15.9164	0	-4.08035
2	+	2025312	2026478	MGG_08894T0	987	MGG_08894	15.9624	0.191621	-3.83134
4	+	2648649	2649420	MGG_14869T0	568	MGG_14869	16.1368	0.423922	-3.58916
5	-	3892912	3897039	MGG_00164T0	3157	MGG_00164	16.1818	0.268233	-3.75999
1	-	1788648	1790810	MGG_02420T0	1524	MGG_02420	16.5371	2.58981	-2.28843
1	-	753941	755657	MGG_02157T0	1627	MGG_02157	16.5681	3.74487	-1.88852
4	+	2220695	2221802	MGG_17113T0	1032	MGG_17113	16.6074	0.049483	-4.06843
6	-	3386230	3388634	MGG_09404T0	2110	MGG_09404	16.6947	4.39436	-1.71379
2	+	3748524	3752834	MGG_01486T0	4020	MGG_01486	16.7799	0.08155	-4.03907
1	-	4087644	4088997	MGG_16274T0	1243	MGG_16274	16.9931	1.02253	-3.15321
4	+	426337	427601	MGG_08497T0	1265	MGG_08497	17.09	0.185644	-3.93145
2	-	1398151	1400225	MGG_04769T0	2075	MGG_04769	17.1176	0.076456	-4.07303
5	-	3303151	3305243	MGG_00314T0	1965	MGG_00314	17.1883	1.37584	-2.93651
1	+	3910046	3912858	MGG_09246T0	2741	MGG_09246	17.283	4.66442	-1.6905
1	+	6586336	6587915	MGG_10637T0	1471	MGG_10637	17.5325	0.086897	-4.09177
2	-	7997015	7999136	MGG_08287T0	1565	MGG_08287	17.6448	0	-4.2207
5	-	596738	602287	MGG_01074T0	4748	MGG_01074	17.6849	2.24253	-2.52668
2	-	6568220	6569434	MGG_07154T0	1215	MGG_07154	18.0674	3.39883	-2.11591
2	+	2500654	2503960	MGG_01171T0	3307	MGG_01171	18.2109	1.00431	-3.26075
7	+	1212482	1214205	MGG_17945T0	1647	MGG_17945	18.3316	0.086028	-4.15383
3	-	6000143	6002064	MGG_07842T0	1922	MGG_07842	18.5587	5.20376	-1.6566
4	-	3189362	3190855	MGG_06586T0	1494	MGG_06586	18.9365	0.800931	-3.4686
2	+	4014299	4015895	MGG_01562T0	1597	MGG_01562	19.2142	5.21382	-1.70181
3	+	3218751	3220107	MGG_13012T0	1116	MGG_13012	19.2216	4.62962	-1.84479
1	-	7641632	7643427	MGG_08640T0	1397	MGG_08640	19.2379	4.02282	-2.01049
7	-	687187	690995	MGG_03002T0	3611	MGG_03002	19.3133	0.155676	-4.13562
3	-	2112910	2114398	MGG_05958T0	1379	MGG_05958	19.3524	0	-4.34713
2	+	4992898	4994327	MGG_01826T0	1430	MGG_01826	19.4178	2.3732	-2.59763
3	+	4845422	4847001	MGG_05175T0	1580	MGG_05175	19.4633	4.24907	-1.9629
1	+	5229758	5231637	MGG_13063T0	1880	MGG_13063	19.4667	1.97332	-2.78313
5	+	2519993	2522482	MGG_00543T0	2181	MGG_00543	19.9215	0.094158	-4.25709
6	+	3219002	3219664	MGG_14371T0	663	MGG_14371	19.9548	0.057856	-4.30807
2	+	4820251	4821614	MGG_01785T0	1364	MGG_01785	20.2879	0.719	-3.63039
8	-	144663	145133	MGG_18115T0	471	MGG_18115	20.8107	3.1558	-2.39184
1	-	3322601	3324398	MGG_06940T0	1798	MGG_06940	20.8686	1.50997	-3.12312
6	-	1237229	1239724	MGG_12210T0	2376	MGG_12210	20.937	5.54459	-1.74499
3	+	1772224	1775094	MGG_05864T0	2871	MGG_05864	21.0422	0.786075	-3.6254
3	-	5373196	5379997	MGG_05315T0	6151	MGG_05315	21.0829	0	-4.46486
3	-	818805	822712	MGG_07493T0	3547	MGG_07493	21.1447	5.00369	-1.88304
2	+	8090300	8093507	MGG_08257T0	3039	MGG_08257	21.1868	5.36657	-1.80112
1	-	216482	219811	MGG_02009T0	3173	MGG_02009	21.2347	5.36362	-1.80489
3	+	2560278	2563053	MGG_06096T0	2683	MGG_06096	21.3596	0.814593	-3.62318
6	-	2332910	2334795	MGG_03983T0	1810	MGG_03983	21.5382	0	-4.4943
1	-	4285858	4289275	MGG_09904T0	3317	MGG_09904	21.8991	3.37207	-2.38891
5	+	1514892	1515896	MGG_00815T0	804	MGG_00815	21.9338	6.53297	-1.60618
4	-	2883873	2885829	MGG_03150T0	1957	MGG_03150	22.0018	4.61011	-2.03565
4	+	2971139	2974586	MGG_03130T0	3368	MGG_03130	22.0321	0.750296	-3.71797
7	+	1143681	1145446	MGG_02886T0	1359	MGG_02886	22.0935	0.075595	-4.42428
6	-	1213081	1214445	MGG_04312T0	1308	MGG_04312	22.2922	2.62888	-2.68225
2	+	4795857	4799722	MGG_01778T0	3393	MGG_01778	22.5581	6.20771	-1.70861
3	+	1486680	1487459	MGG_07677T0	780	MGG_07677	22.5829	3.97524	-2.2449
2	-	3304917	3309515	MGG_01376T0	4500	MGG_01376	22.9399	0.926176	-3.6356
4	+	2522187	2526707	MGG_03254T0	4521	MGG_03254	22.9434	4.61601	-2.09201
6	-	1405530	1407471	MGG_04253T0	1942	MGG_04253	22.9456	6.90011	-1.59981
5	+	1158267	1160443	MGG_00913T0	2177	MGG_00913	22.9778	0.120433	-4.41957
2	-	95695	99013	MGG_15496T0	3319	MGG_15496	23.1439	1.07613	-3.53969
3	-	5420678	5423066	MGG_05328T0	2389	MGG_05328	23.1624	4.8812	-2.03858
1	-	4855986	4856949	MGG_05335T0	879	MGG_05335	23.2327	0.817114	-3.73723
1	+	661765	662093	MGG_13716T0	237	MGG_13716	23.255	1.8012	-3.11417
1	+	4417067	4419248	MGG_14550T0	1664	MGG_14550	23.4015	2.33345	-2.87188
7	+	2529580	2532204	MGG_09061T0	2473	MGG_09061	23.6231	4.9907	-2.03922
1	-	2526274	2529237	MGG_06729T0	2656	MGG_06729	23.6602	4.13985	-2.26239
4	-	1066996	1068160	MGG_03671T0	1048	MGG_03671	23.6877	5.69247	-1.88318
5	-	2256303	2261058	MGG_00617T0	3883	MGG_00617	23.7479	0.10243	-4.48855
2	+	7887461	7889436	MGG_15951T0	1871	MGG_15951	23.7788	0.180891	-4.39116
8	-	404350	405454	MGG_10213T0	1014	MGG_10213	23.9495	2.49079	-2.83738
2	-	4151494	4155210	MGG_01601T0	3717	MGG_01601	24.3063	1.99522	-3.07876
1	-	4235134	4236997	MGG_09888T0	1864	MGG_09888	24.3275	0.670408	-3.92243
3	-	2809848	2812133	MGG_06167T0	2212	MGG_06167	24.3614	3.79526	-2.40295
2	+	6933399	6933629	MGG_07245T0	231	MGG_07245	24.4138	0.068984	-4.5713
3	-	2129267	2130254	MGG_16724T0	896	MGG_16724	24.5784	2.65385	-2.80743
7	-	2485122	2489008	MGG_02531T0	3518	MGG_02531	24.8383	3.82302	-2.4215
7	+	1685015	1687643	MGG_02744T0	2454	MGG_02744	24.9515	0.11675	-4.53844
5	+	317360	320302	MGG_14633T0	2943	MGG_14633	24.9564	1.89657	-3.16367
4	+	3818123	3820193	MGG_06417T0	2071	MGG_06417	25.2797	5.66367	-1.97956
6	-	2209827	2213510	MGG_12130T1	3318	MGG_12130	25.3696	6.10355	-1.89226
2	-	647467	649251	MGG_04367T0	1785	MGG_04367	25.4177	1.32457	-3.50647
1	+	564156	567691	MGG_02099T0	3460	MGG_02099	25.491	5.32615	-2.0661
3	+	4828672	4831422	MGG_12926T0	2636	MGG_12926	25.5163	0.494759	-4.14889
1	+	2940668	2941777	MGG_16184T0	975	MGG_16184	25.5849	3.39188	-2.5977
5	+	312113	316195	MGG_01156T1	3816	MGG_01156	25.6184	5.54744	-2.02342
6	-	4103554	4106427	MGG_15429T0	2799	MGG_15429	25.6352	1.41121	-3.46551
7	+	1452846	1453610	MGG_02805T0	675	MGG_02805	25.8804	5.93582	-1.95442
2	+	3909241	3911180	MGG_01530T0	1761	MGG_01530	26.0321	0	-4.7566
2	-	466994	469720	MGG_14728T0	2583	MGG_14728	26.2855	4.84389	-2.22313
4	+	1295401	1297639	MGG_13514T0	1848	MGG_13514	26.3613	0.69254	-4.01488
1	-	6281101	6283167	MGG_13161T0	1980	MGG_13161	26.372	0.135101	-4.59181
5	+	2441108	2442847	MGG_00574T0	1512	MGG_00574	26.4074	6.81733	-1.80982
1	+	4987510	4990016	MGG_13025T0	2341	MGG_13025	26.5031	0.887552	-3.86501
1	-	1336118	1338286	MGG_11962T0	1854	MGG_11962	26.9081	0.237701	-4.49495
1	+	4450923	4452468	MGG_09948T0	1372	MGG_09948	26.9198	2.27532	-3.09158
2	+	4295186	4298756	MGG_01639T0	3252	MGG_01639	26.9451	2.44566	-3.01975
4	+	269109	270920	MGG_13946T0	1627	MGG_13946	26.953	2.1623	-3.14396
2	+	3717428	3719156	MGG_01478T0	1449	MGG_01478	26.9909	3.80336	-2.54284
7	+	2680095	2681880	MGG_09022T0	1595	MGG_09022	27.0287	5.08323	-2.204
2	+	5739603	5741185	MGG_08115T0	1382	MGG_08115	27.0435	5.03431	-2.21641
7	+	317562	318679	MGG_03098T0	984	MGG_03098	27.1793	4.79931	-2.28068
1	-	1223228	1224871	MGG_02272T0	1581	MGG_02272	27.2761	1.51503	-3.49094
4	+	5184554	5191132	MGG_09784T0	6044	MGG_09784	27.3823	2.20017	-3.14877
1	-	1111011	1111959	MGG_02241T0	949	MGG_02241	27.6308	2.19084	-3.16556
3	-	4882174	4884440	MGG_05184T0	2172	MGG_05184	27.7022	3.01999	-2.8359
1	-	2480918	2483879	MGG_11870T0	2962	MGG_11870	27.802	8.54286	-1.59367
3	+	3360326	3362266	MGG_09530T0	1724	MGG_09530	27.8335	2.3288	-3.11467
6	-	1776056	1778934	MGG_17677T0	2475	MGG_17677	28.1193	0.205471	-4.59431
6	+	2168436	2170853	MGG_04034T0	1749	MGG_04034	28.1876	0.306893	-4.48114
1	+	3622183	3629563	MGG_14558T0	7290	MGG_14558	28.2999	0.169196	-4.6473
3	+	6105162	6107027	MGG_07868T0	1628	MGG_07868	28.545	4.86911	-2.3317
1	-	4382204	4387947	MGG_09931T0	4878	MGG_09931	28.6953	1.64461	-3.48911
5	-	2201941	2204934	MGG_00631T0	2994	MGG_00631	30.0139	8.99799	-1.6332
2	+	2732837	2733307	MGG_15646T0	237	MGG_15646	30.2123	4.66885	-2.46099
5	-	2490083	2490534	MGG_00556T0	312	MGG_00556	30.214	8.64827	-1.69385
3	+	4348236	4349809	MGG_05028T0	1574	MGG_05028	30.259	8.10684	-1.77925
1	-	4494859	4498568	MGG_09956T0	3458	MGG_09956	30.4519	5.26854	-2.32695
2	-	5208829	5211925	MGG_01885T0	2572	MGG_01885	30.6802	0.095545	-4.85386
3	-	895434	898705	MGG_07517T0	2768	MGG_07517	30.7148	2.67794	-3.10819
7	+	1302449	1307164	MGG_17953T0	4420	MGG_17953	30.9398	0.084048	-4.88085
2	-	7893095	7894654	MGG_08317T0	1413	MGG_08317	31.0642	0.353615	-4.56608
2	-	8039187	8041139	MGG_08276T0	1839	MGG_08276	31.2575	9.5244	-1.6159
4	-	2954805	2958223	MGG_03133T0	3317	MGG_03133	31.512	3.26035	-2.93193
2	-	7267551	7271939	MGG_07327T0	3895	MGG_07327	31.607	0	-5.02711
2	-	470144	471415	MGG_14729T0	1202	MGG_14729	32.0565	5.36364	-2.37701
3	+	1794808	1797172	MGG_05871T0	1896	MGG_05871	32.0653	4.20117	-2.66841
5	+	2518124	2518878	MGG_00544T0	588	MGG_00544	32.2149	0.215945	-4.77168
8	-	232007	235212	MGG_10269T0	3027	MGG_10269	32.406	0	-5.06204
1	+	4710879	4711818	MGG_10524T0	940	MGG_10524	32.4432	0.744873	-4.26052
2	+	1508116	1511317	MGG_04828T0	2812	MGG_04828	32.7985	1.33336	-3.85648
1	-	2263755	2264111	MGG_16146T0	357	MGG_16146	32.868	1.08172	-4.02407
4	+	4430621	4434809	MGG_06243T0	4067	MGG_06243	32.9343	4.33258	-2.66984
5	-	1538921	1541666	MGG_14658T0	1269	MGG_14658	33.121	8.6811	-1.81742
2	-	2184240	2186429	MGG_08937T0	2022	MGG_08937	33.4055	0.479614	-4.53935
1	+	201074	201655	MGG_02004T0	582	MGG_02004	34.0843	0.806919	-4.27922
5	-	3223528	3225236	MGG_11596T0	1186	MGG_11596	34.611	3.28606	-3.0546
6	-	779905	781164	MGG_14970T0	1053	MGG_14970	34.7	3.3352	-3.04175
4	-	1244483	1246786	MGG_13499T0	2056	MGG_13499	34.7207	3.17588	-3.09661
7	+	1762678	1764329	MGG_02717T0	1652	MGG_02717	35.1018	6.39092	-2.28825
2	+	7180272	7182625	MGG_07306T0	2259	MGG_07306	35.2797	10.8692	-1.61194
3	-	5661127	5661600	MGG_07762T0	474	MGG_07762	35.859	4.41078	-2.76811
5	+	3540068	3541504	MGG_00244T0	1245	MGG_00244	36.157	0.157489	-5.00456
5	-	603219	606733	MGG_01073T0	3260	MGG_01073	36.164	0	-5.21583
1	-	4389625	4391964	MGG_09932T0	2199	MGG_09932	36.986	9.03336	-1.92066
2	-	4328730	4332956	MGG_15749T0	4032	MGG_15749	37.044	0.241424	-4.9376
5	+	3713850	3718799	MGG_11636T0	4950	MGG_11636	37.3161	1.53201	-3.9196
4	+	4439247	4441717	MGG_06240T0	2260	MGG_06240	37.3167	1.90115	-3.72328
2	+	5577379	5580628	MGG_12268T0	3081	MGG_12268	37.9246	0.103195	-5.14092
5	-	506823	508761	MGG_01102T0	1739	MGG_01102	38.2126	9.87095	-1.85084
6	-	2917891	2919932	MGG_03824T0	1872	MGG_03824	38.8962	6.22082	-2.46602
5	+	2570261	2572083	MGG_00534T0	1702	MGG_00534	39.1088	6.9838	-2.32877
3	-	3257262	3261213	MGG_09564T0	3877	MGG_09564	39.3384	9.37986	-1.95837
3	+	6420183	6420552	MGG_07969T0	306	MGG_07969	39.6161	8.73989	-2.06008
2	+	6494477	6496908	MGG_07134T1	2031	MGG_07134	40.2929	0.598969	-4.69068
3	-	1441498	1442974	MGG_13448T0	1360	MGG_13448	41.1203	12.5632	-1.63481
2	+	4749855	4751320	MGG_01762T0	1207	MGG_01762	41.8222	0	-5.42029
6	-	2367071	2372264	MGG_12122T0	4812	MGG_12122	43.2996	6.40192	-2.58132
1	+	3202292	3204407	MGG_06904T0	2016	MGG_06904	43.5671	12.1105	-1.76525
3	+	4810023	4812706	MGG_05164T0	2466	MGG_05164	44.1707	10.4386	-1.98147
3	-	3331617	3334674	MGG_09540T0	2380	MGG_09540	44.84	2.83402	-3.57968
3	+	5775557	5776711	MGG_07792T0	1155	MGG_07792	45.3336	13.6771	-1.65849
2	+	731973	736317	MGG_15537T0	3875	MGG_15537	45.3683	1.7151	-4.09406
5	-	381605	385584	MGG_01133T0	3378	MGG_01133	46.0274	0.943797	-4.59655
2	-	5173056	5174512	MGG_01872T0	1388	MGG_01872	46.8429	3.31235	-3.47176
1	-	7344964	7346726	MGG_04482T0	1222	MGG_04482	47.0871	1.11428	-4.50741
6	-	157270	160227	MGG_08774T0	2648	MGG_08774	47.1481	10.1532	-2.11002
2	+	5183684	5184835	MGG_01876T0	1152	MGG_01876	48.0407	12.9639	-1.81228
3	+	4062962	4065356	MGG_04956T0	2103	MGG_04956	49.2294	0.29307	-5.27966
5	+	4044225	4046538	MGG_00127T0	2040	MGG_00127	49.2936	9.53737	-2.25486
3	+	248371	251831	MGG_09119T0	2737	MGG_09119	49.3146	8.35787	-2.42672
7	-	1699676	1700851	MGG_02738T0	884	MGG_02738	49.364	9.21692	-2.30143
1	-	1961754	1963124	MGG_02463T0	815	MGG_02463	49.6508	1.56658	-4.30267
3	+	2099200	2100554	MGG_16720T0	1144	MGG_16720	49.842	2.3708	-3.91486
3	-	2678268	2679987	MGG_06133T0	1536	MGG_06133	50.1542	6.27856	-2.81313
4	-	2499275	2502416	MGG_14872T0	2749	MGG_14872	50.4793	3.56634	-3.49488
1	+	7547859	7549533	MGG_16538T0	1485	MGG_16538	50.9005	11.7141	-2.02932
2	+	1807038	1808830	MGG_08832T0	1641	MGG_08832	51.5781	5.17568	-3.08979
6	-	2260211	2261728	MGG_04005T0	1152	MGG_04005	51.7223	0.062571	-5.63278
1	-	5255386	5257134	MGG_05450T0	1356	MGG_05450	52.6506	0	-5.74552
2	+	8037315	8038960	MGG_12484T0	1572	MGG_12484	52.7507	10.1563	-2.26842
3	-	5666389	5668643	MGG_07763T0	1524	MGG_07763	53.6373	7.1501	-2.745
3	+	5446035	5447532	MGG_14463T0	1415	MGG_14463	53.7875	8.75776	-2.48922
1	-	2220535	2223345	MGG_06638T0	2743	MGG_06638	54.2779	0.018947	-5.76155
4	-	234874	237048	MGG_08446T0	2016	MGG_08446	55.341	11.8661	-2.1306
2	+	1464532	1467346	MGG_04804T0	2745	MGG_04804	55.9476	2.05902	-4.21849
4	+	4437453	4439145	MGG_06241T0	1452	MGG_06241	57.9698	10.8548	-2.31451
3	+	2278742	2279060	MGG_13236T0	210	MGG_13236	59.1689	0.217139	-5.62745
2	-	6260644	6261630	MGG_15074T0	900	MGG_15074	60.8935	0.262994	-5.61487
3	-	4712421	4713722	MGG_12936T0	1134	MGG_12936	61.2696	5.88279	-3.17746
6	+	4073815	4075885	MGG_14157T0	1918	MGG_14157	66.3522	19.6526	-1.7054
4	-	5336353	5337782	MGG_09742T0	1430	MGG_09742	67.3679	18.0883	-1.84063
5	-	3145452	3146679	MGG_00355T0	850	MGG_00355	68.3733	21.6473	-1.61504
3	+	5527939	5529416	MGG_15245T0	1478	MGG_15245	73.6087	9.742	-2.79608
2	+	4631516	4632073	MGG_11155T0	558	MGG_11155	73.718	0.044508	-6.16056
5	-	1425814	1426780	MGG_00843T0	882	MGG_00843	73.8218	19.2389	-1.88633
4	+	3269742	3271696	MGG_06564T0	1955	MGG_06564	73.9972	3.37617	-4.0991
4	+	4627661	4628838	MGG_10105T0	999	MGG_10105	74.5205	10.0345	-2.77485
2	+	5876463	5878523	MGG_12300T0	1308	MGG_12300	75.1176	14.0024	-2.34304
4	+	1664815	1666590	MGG_03504T0	1507	MGG_03504	76.8929	1.16633	-5.16817
2	-	6780832	6782921	MGG_07210T0	1775	MGG_07210	77.9672	17.7799	-2.07207
7	+	221696	222226	MGG_10292T0	456	MGG_10292	80.7653	0.114531	-6.19698
2	+	6056077	6056643	MGG_08203T0	486	MGG_08203	81.2518	0	-6.36197
2	-	1069379	1072666	MGG_04603T0	3012	MGG_04603	85.5362	18.4472	-2.15374
5	-	1892248	1894228	MGG_00718T0	1911	MGG_00718	87.675	3.80488	-4.20595
4	+	3615959	3617387	MGG_06472T0	1264	MGG_06472	89.3117	4.03505	-4.16484
7	+	2198634	2200418	MGG_02612T0	1562	MGG_02612	92.2801	1.10277	-5.4712
4	+	993101	995803	MGG_03696T0	2366	MGG_03696	93.5809	4.64893	-4.0655
2	+	2726390	2727447	MGG_01222T0	758	MGG_01222	95.059	29.2949	-1.66485
4	+	3068037	3070492	MGG_06623T0	2226	MGG_06623	95.6497	14.3491	-2.65462
2	+	475872	477740	MGG_10380T0	1869	MGG_10380	96.2236	6.89113	-3.623
3	+	2604433	2605950	MGG_06108T0	1136	MGG_06108	99.0061	26.6303	-1.85577
5	+	3236690	3238271	MGG_00331T0	1360	MGG_00331	102.662	12.4195	-2.94949
6	+	2617932	2619619	MGG_12095T0	1451	MGG_12095	103.521	12.0982	-2.99636
6	-	929931	931640	MGG_10394T0	1710	MGG_10394	104.228	14.4556	-2.76731
3	-	1090815	1092787	MGG_07577T0	1821	MGG_07577	104.519	32.2087	-1.66788
7	+	2228077	2229958	MGG_02602T0	1882	MGG_02602	111.116	12.4266	-3.06183
5	+	1909957	1912236	MGG_00710T0	2100	MGG_00710	114.794	0.080414	-6.74383
5	-	3328129	3329333	MGG_00307T0	1037	MGG_00307	115.507	9.40523	-3.48504
5	-	81748	82116	MGG_17297T0	369	MGG_17297	115.834	2.5011	-5.06051
4	-	5349711	5350883	MGG_09736T0	1084	MGG_09736	121.585	30.2158	-1.97343
4	-	4358020	4360124	MGG_06263T0	2014	MGG_06263	125.557	6.41903	-4.09241
3	+	165024	165784	MGG_09100T0	645	MGG_09100	134.419	19.5443	-2.72062
6	-	1495366	1498010	MGG_04225T0	2117	MGG_04225	136.252	22.0871	-2.57166
4	-	549720	551007	MGG_08535T0	1288	MGG_08535	139.078	43.6388	-1.64986
2	+	5637484	5639428	MGG_12275T0	1945	MGG_12275	144.685	28.7841	-2.29023
6	+	1472758	1475083	MGG_04234T0	1867	MGG_04234	145.607	14.7869	-3.21516
1	-	5522572	5523941	MGG_05531T0	1295	MGG_05531	150.02	37.3706	-1.97667
1	+	6096934	6097604	MGG_05679T0	441	MGG_05679	153.95	15.3334	-3.24591
3	+	4369807	4371859	MGG_05035T0	2053	MGG_05035	159.126	49.987	-1.651
2	-	5910472	5911012	MGG_08163T0	171	MGG_08163	163.079	28.2843	-2.48619
2	-	4460539	4462426	MGG_01687T0	1620	MGG_01687	164.337	4.18458	-4.99504
5	+	3603321	3604104	MGG_00225T0	537	MGG_00225	166.289	0	-7.3862
2	-	7953160	7954095	MGG_08300T0	936	MGG_08300	170.058	35.9862	-2.20943
7	-	1150200	1152279	MGG_02884T0	1784	MGG_02884	201.782	0.569191	-7.01377
2	-	1704119	1706778	MGG_11335T0	2508	MGG_11335	203.669	45.1434	-2.14909
3	-	2181627	2183370	MGG_05982T0	1458	MGG_05982	218.069	21.8254	-3.26267
5	-	2598978	2599732	MGG_00527T0	624	MGG_00527	224.242	2.84386	-5.87278
2	-	1128015	1129951	MGG_04647T0	1727	MGG_04647	231.107	29.9344	-2.9075
1	+	6871257	6873177	MGG_04719T0	1417	MGG_04719	233.93	7.65651	-4.7623
5	+	3881422	3882980	MGG_00167T0	1346	MGG_00167	254.557	23.1229	-3.40517
4	+	1038017	1039505	MGG_03680T0	1178	MGG_03680	270.968	28.5355	-3.20292
1	-	4481490	4482932	MGG_09952T0	822	MGG_09952	280.591	15.597	-4.08461
7	-	433613	437164	MGG_12523T0	3498	MGG_12523	310.65	71.7592	-2.09873
4	-	2626786	2627552	MGG_03227T0	548	MGG_03227	334.538	0.716249	-7.61107
2	-	3200528	3202683	MGG_11224T0	2156	MGG_11224	337.776	15.6088	-4.35031
3	-	6433003	6434135	MGG_07975T0	1133	MGG_07975	339.093	105.555	-1.67433
3	-	4030130	4031767	MGG_04944T0	1571	MGG_04944	349.825	102.948	-1.75489
4	-	2248166	2248654	MGG_03326T0	405	MGG_03326	375.744	98.6542	-1.91858
3	+	6492481	6493163	MGG_15267T0	531	MGG_15267	385.928	96.6321	-1.98664
4	+	4985797	4986204	MGG_10004T0	408	MGG_10004	389.74	31.0412	-3.60821
4	-	1350903	1352455	MGG_03593T0	1553	MGG_03593	402.435	73.1467	-2.44388
7	+	2155693	2156595	MGG_02625T0	477	MGG_02625	414.521	0.760368	-7.8829
6	-	3822721	3824284	MGG_09875T0	1467	MGG_09875	428.013	124.683	-1.77123
2	-	1615341	1617910	MGG_10150T0	2195	MGG_10150	437.923	78.3377	-2.46789
1	+	2297325	2298728	MGG_06653T0	1305	MGG_06653	538.847	108.039	-2.3077
1	-	4572932	4574735	MGG_10660T0	1031	MGG_10660	733.344	0	-9.52031
1	-	3355873	3356860	MGG_06953T0	918	MGG_06953	892.943	223.836	-1.99131
4	-	2244869	2246989	MGG_03327T0	1707	MGG_03327	912.132	271.522	-1.74445
4	-	2164545	2165174	MGG_03354T0	630	MGG_03354	1813.17	480.911	-1.91247
8	-	77947	79107	MGG_09134T0	933	MGG_09134	5836.21	935.964	-2.63921
